# Supplementary material
Source: Springer Nature journal article supplement (https://www.springermedizin.de/resource/supplementary/12936_2010_1684_MOESM2_ESM.pdf/9541530)

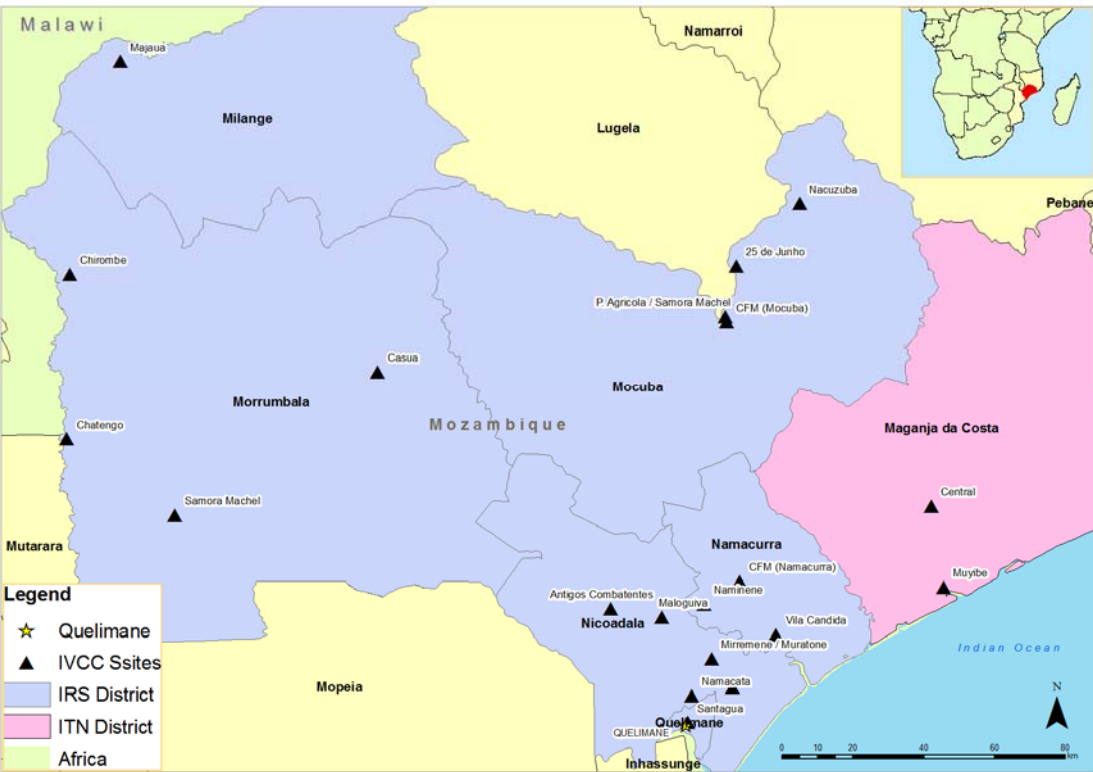

- Legend**
- ★ Quelimane
  - ▲ IVCC Ssites
  - IRS District
  - ITN District
  - Africa

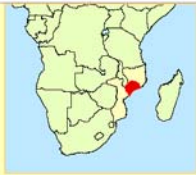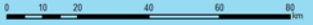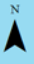

Supplement: MOESM2 [file 9541530]
